# Supplementary material
Source: publisher site journal article supplement (http://www.kjim.org/upload/media/kjim-2023-086-Supplementary-Fig-2.pdf)
Supplement: Supplementary file 1 [file kjim-2023-086-Supplementary-Fig-2.pdf]

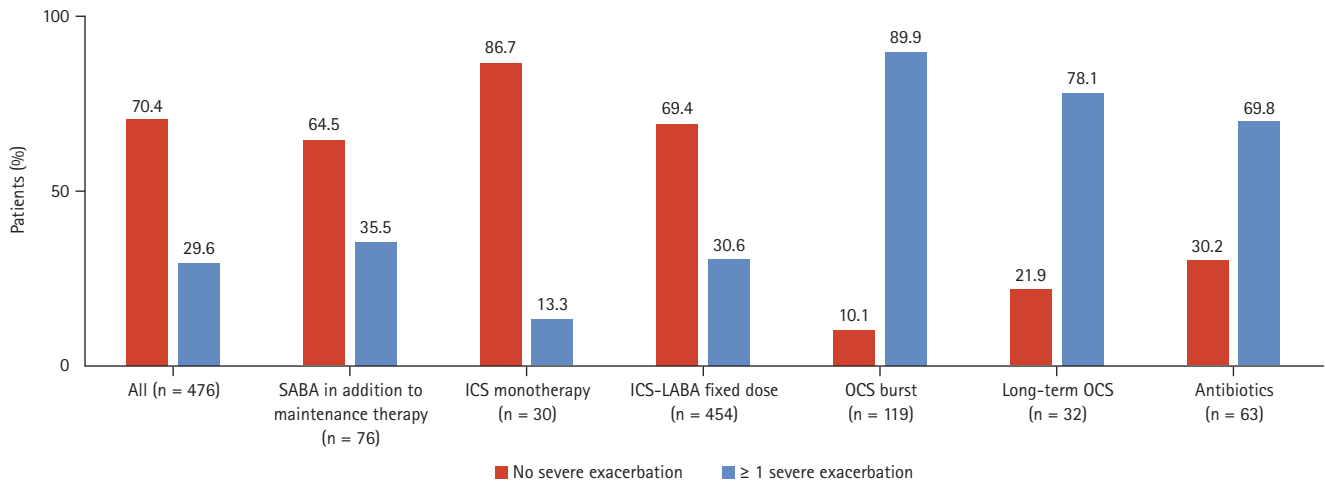

**Supplementary Figure 2.** Percentage of severe exacerbations in the 12 months before the study visit by asthma treatment. Only 1 patient received SABA monotherapy and was not included in the figure. Data on practice type were not available for 4 patients. ICS, inhaled corticosteroid; LABA, long-acting  $\beta_2$ -agonist; OCS, oral corticosteroid; SABA, short-acting  $\beta_2$ -agonist.
